# Supplementary material
Source: PubMed Central journal article supplement (PMC3310275)
Supplement: NIHMS359464-supplement-1_si_001.pdf [file NIHMS359464-supplement-1_si_001.pdf]

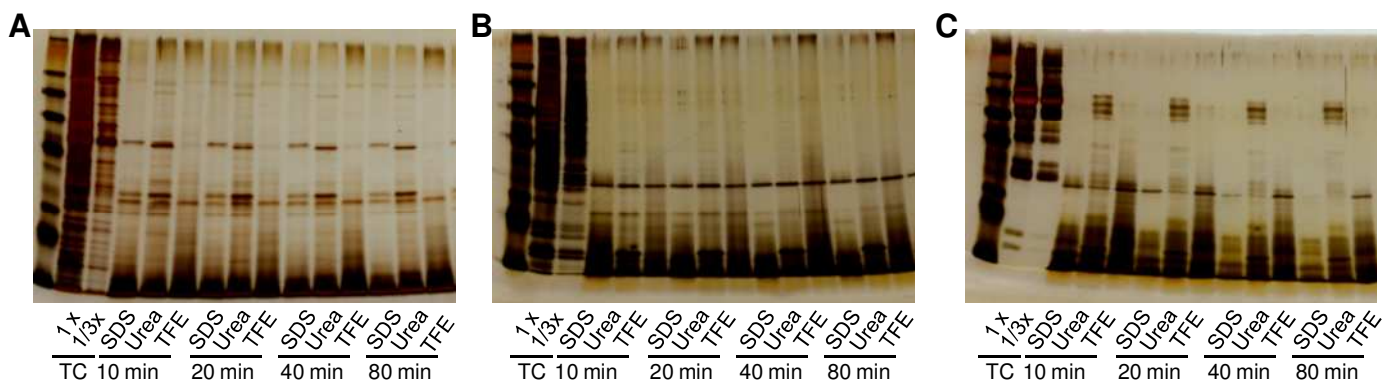

**Supplementary Figure 1.** Time course of different digestion protocols

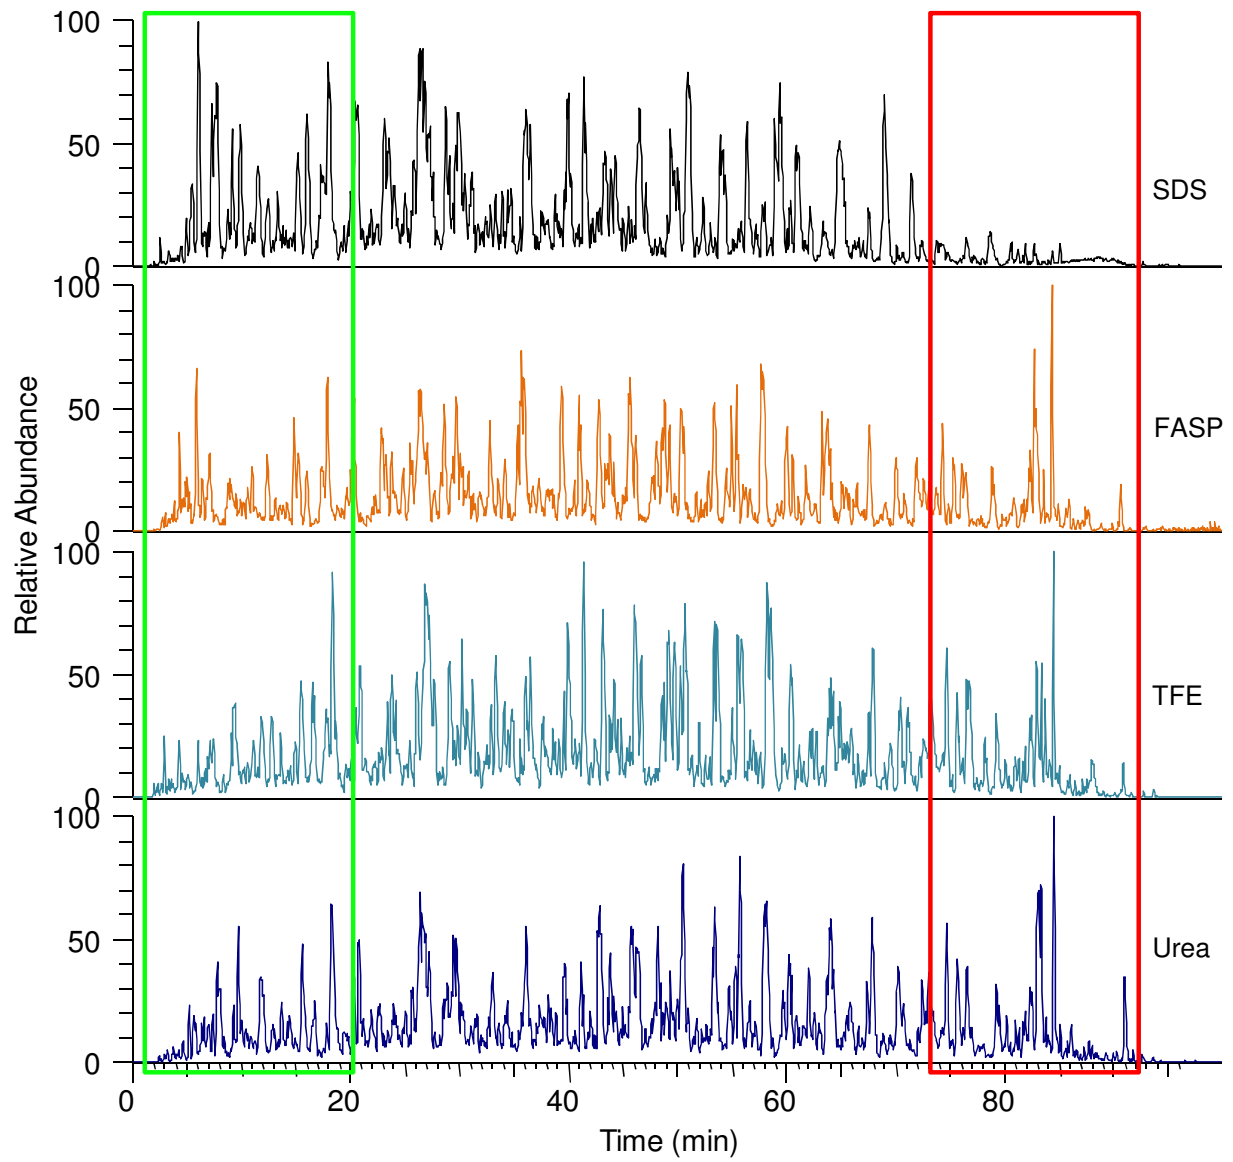

**Supplementary Figure 2.** A comparison of chromatograms between different digestion protocols.
